# Supplementary material
Source: publisher figshare collection journal article supplement (https://frontiersin.figshare.com/ndownloader/files/31135267)
Supplement: Supplementary file [file 31135267]

# Supplementary Material

## 1 Supplementary Figures

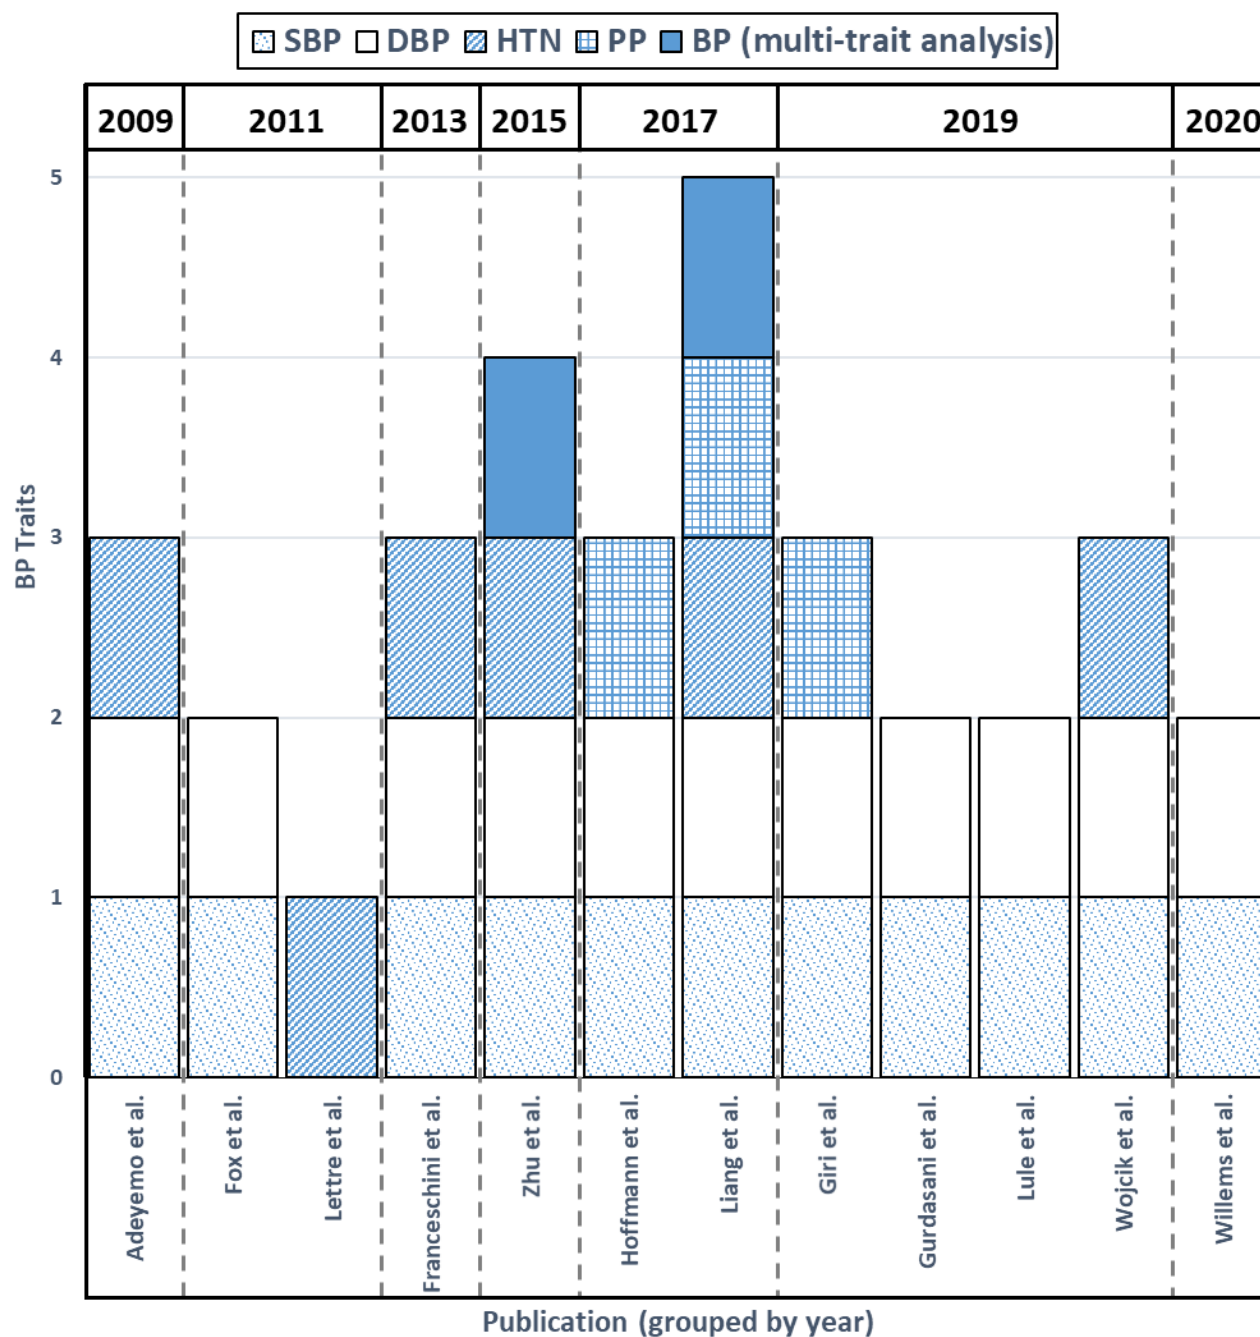

Figure S 1: Distribution of BP traits for the 12 eligible publications (by year)
